# Supplementary material for: CRISPR engineering of armored CAR T cells enables tumor restricted payload delivery with enhanced efficacy and safety
Source: Research Square preprint supplement (doi:10.21203/rs.3.rs-3752711/v1), 2025-04-28
Supplement: Supplementary file 1 [file 088718f8404299dcb222ab9c.xlsx]

## Sheet: Murine CAR T cells
Supplementary Table 1 (Murine CAR T cells)
Target genes	CD62L- Tumor CPM (Replicate 1)	CD62L- Tumor CPM (Replicate 2)	CD62L+ Spleen CPM (Replicate 1)	logFC (Tumor vs Spleen)
Ak4	22.492	13.6	0	8.81883
Aldoa	534.685	537.209	163.733	1.50328
Cd9	49.875	55.447	3.275	10.3774
Clu	34.717	19.616	1.511	4.28542
Dusp4	18.825	41.847	0.252	9.59945
Egr1	144.49	205.834	26.953	3.45154
Fos	146.201	97.294	45.341	2.0103
Fosb	120.286	120.048	3.778	4.25456
Hif1a	214.412	200.603	67.005	1.27147
Jun	249.862	251.081	106.804	2.06366
Junb	1029.52	1270.84	155.169	3.01391
Klrc1	1.956	3.139	0.504	6.0373
Mt1	243.505	176.28	2.015	3.21952
Mt2	216.612	167.387	0.756	2.92973
Nfkbia	1429	1791.57	566.768	1.46895
Nr4a2	669.395	955.939	2.771	6.66252
Pdcd1	67.722	62.77	1.511	4.58205
Pkm	658.149	567.809	145.848	2.09026
Rbpj	118.085	152.479	42.319	1.09877
Rgs1	268.442	257.62	15.87	2.36588
Rgs16	87.28	103.832	0	6.11859
Rgs2	246.928	248.204	29.22	1.91334
Sh2d2a	212.945	229.896	113.354	1.05966
Socs1	37.406	45.77	13.854	2.73015
Tnfaip3	89.481	135.741	6.297	2.70048
Tpi1	208.3	192.757	23.93	3.55613
Zmiz1	113.685	90.494	40.807	0.192162

## Sheet: Human CAR T cells
Supplementary Table 2 (Human CAR T cells)
Target genes	CD8					CD4
	Tumor CPM (Replicate 1)	Tumor CPM (Replicate 2)	Spleen CPM (Replicate 1)	Spleen CPM (Replicate 2)	logFC (Tumor vs Spleen)	Tumor CPM (Replicate 1)	Tumor CPM (Replicate 2)	Spleen CPM (Replicate 1)	Spleen CPM (Replicate 2)	logFC (Tumor vs Spleen)
AK4	64.733	58.656	2.145	1.654	5.06006	35.236	3.815	1.624	2.271	3.55249
ALDOA	227.777	208.933	120.959	106.53	0.99604	174.639	183.566	123.095	107.534	0.850201
CD9	168.533	184.016	52.476	44.498	1.91722	114.18	76.523	33.291	32.277	1.75962
CLU	220.19	142.229	5.611	9.098	4.67282	377.775	393.613	6.658	8.11	5.91976
DUSP4	140.767	122.265	9.076	9.263	3.89378	130.354	150.803	20.787	21.572	2.94516
EGR1	48.752	41.322	22.608	23.49	1.02033	76.441	89.539	30.53	37.953	1.49374
FOS	156.264	147.337	54.951	46.979	1.62954	197.36	219.023	51.317	30.979	2.55048
FOSB	47.299	60.049	10.396	7.278	2.65559	33.503	59.244	8.769	9.245	2.57337
HIF1A	104.929	85.895	50.496	56.408	0.890059	75.093	115.122	31.667	39.413	1.63425
JUN	578.402	585.942	111.553	93.131	2.56333	544.905	541.498	64.146	55.47	3.39815
JUNB	430.049	518.155	163.699	165.75	1.5801	460.185	485.62	188.865	175.169	1.59301
KLRC1	330.285	390.009	92.246	78.739	2.13002	28.882	17.728	1.462	0.162	5.02983
MT1E	182.254	177.052	74.754	58.889	1.48219	128.428	104.799	114.326	100.56	0.335441
MT2A	571.622	650.634	287.959	246.144	1.24988	358.713	361.747	321.866	315.305	0.393623
NFKBIA	628.607	591.359	223.436	224.143	1.50148	605.172	673.899	274.447	266.647	1.45685
NR4A2	46.007	53.085	6.271	6.451	3.01212	12.515	24.909	3.41	1.784	3.04399
PDCD1	10.977	7.119	2.145	3.143	1.81948	48.522	3.591	16.239	15.571	0.940821
PKM	636.517	573.87	254.295	293.784	1.1974	692.588	698.808	307.251	267.295	1.4913
RBPJ	947.753	900.425	219.971	198.668	2.1975	994.885	916.036	334.695	315.954	1.77079
RGS1	118.005	91.931	10.726	8.933	3.46862	384.899	368.254	37.188	29.844	3.70445
RGS16	256.35	311.543	4.621	2.481	6.36778	321.744	259.641	4.709	6.812	5.87073
RGS2	114.938	163.587	7.261	6.948	4.34414	77.403	131.728	18.026	15.733	2.84096
SH2D2A	224.387	238.803	133.831	141.433	0.805574	321.359	267.271	158.497	161.545	1.09704
SOCS1	36.322	29.405	13.037	16.211	1.221	23.298	38.374	13.316	11.029	1.54954
TNFAIP3	94.921	97.347	36.964	50.287	1.19362	136.9	118.712	39.137	38.602	1.93432
TPI1	368.382	428.081	158.254	152.682	1.41209	310.577	273.554	183.831	178.089	0.907781
ZMIZ1	87.656	80.942	31.024	27.46	1.58201	65.273	64.181	31.992	36.818	1.12923
